# Supplementary material for: Copper- and manganese-based layered hybrid organic–inorganic compounds with polymorphic transitions as energy storage materials
Source: Royal Society of Chemistry journal article supplement (doi:10.1039/d4ta01060d), 2024-01-01
Supplement: d4ta01060d1.pdf [file d4ta01060d1.pdf]

## Supplementary Materials

### Copper and manganese based layered hybrid organic-inorganic compounds with polymorphic transitions as energy storage materials

#### 1 X-Ray Difraccion supplementary results

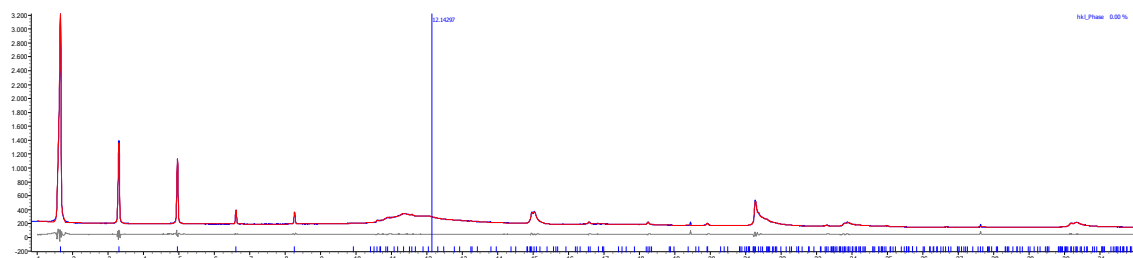

Figure S 1 Pattern matching Pawley fit plot of  $MnC_{12}$ . Agreement factors:  $R_{wp} = 4.33\%$ ,  $R_p = 2.57\%$ . The plot shows the experimental powder XRD profile (blue solid line), the calculated powder XRD profile (red solid line), and the difference profile (grey, lower line). Blue tick marks indicate peak positions.

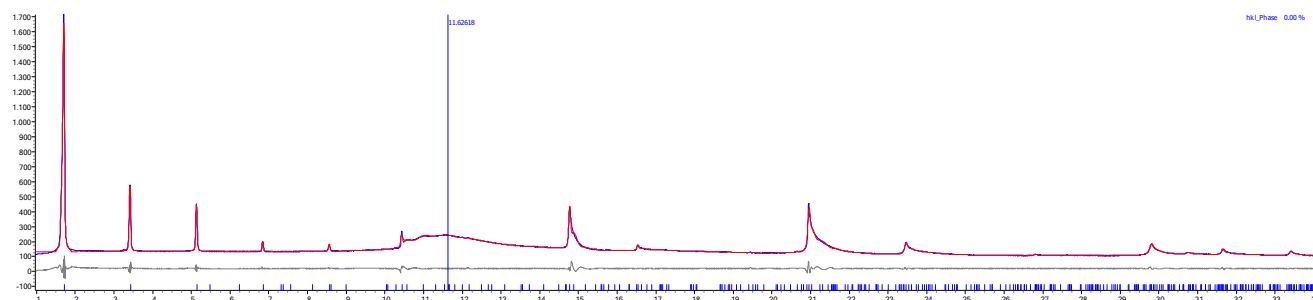

Figure S 2 Pattern matching Pawley fit plot of  $CuC_{12}$ . Agreement factors:  $R_{wp} = 4.91\%$ ,  $R_p = 2.97\%$ . The plot shows the experimental powder XRD profile (blue solid line), the calculated powder XRD profile (red solid line), and the difference profile (grey, lower line). Blue tick marks indicate peak positions.

## 2 Nuclear magnetic resonance supplementary results

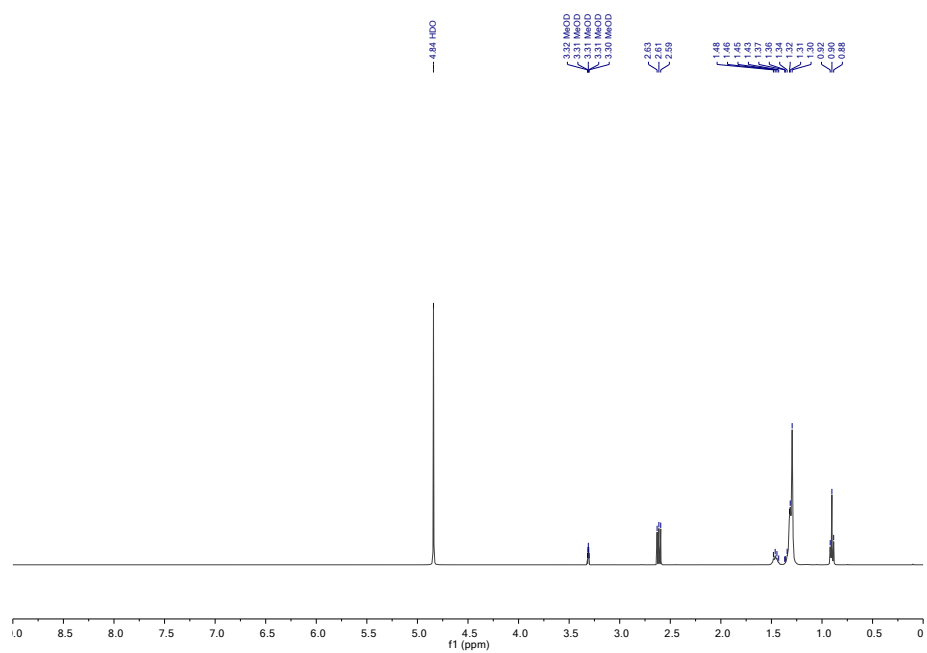

Figure S 3  $^1\text{H}$  NMR  $\text{C}_{12}\text{H}_{27}\text{N}$ .

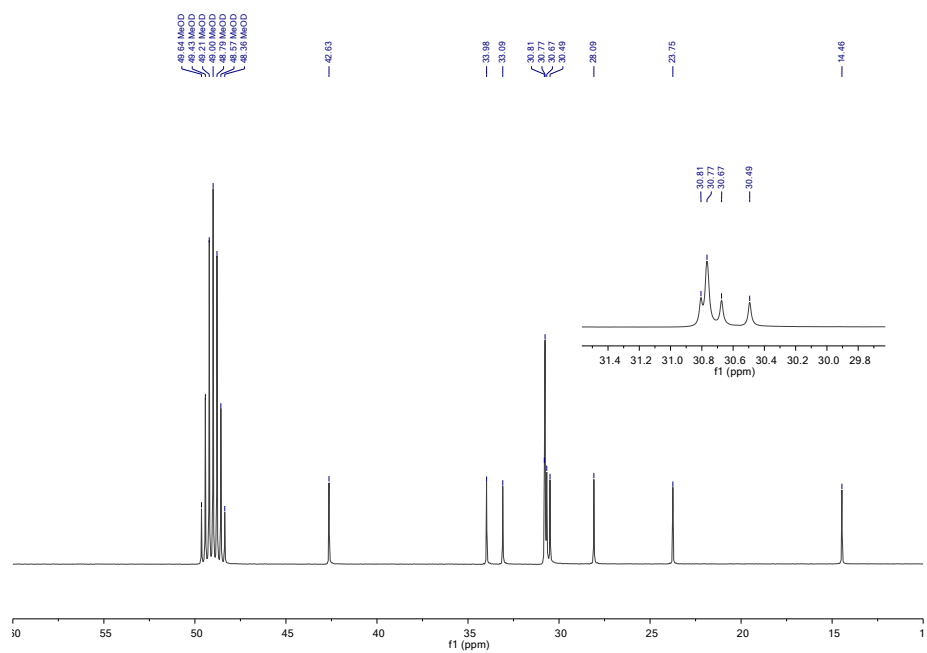

Figure S 4  $^{13}\text{C}$  NMR  $\text{C}_{12}\text{H}_{27}\text{N}$ .

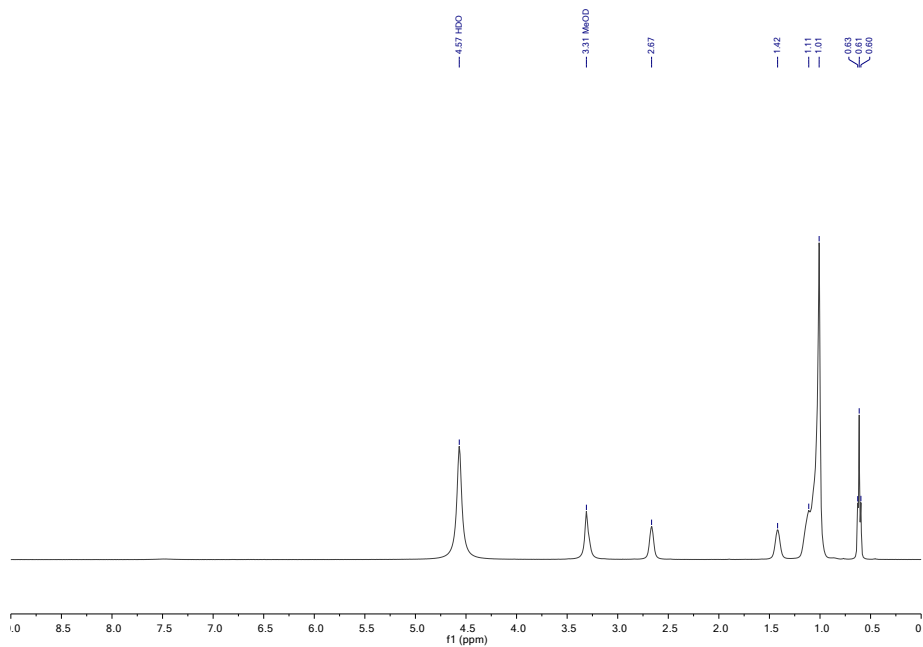

Figure S 5  $^1\text{H}$  NMR  $\text{CuC}_{12}$ .

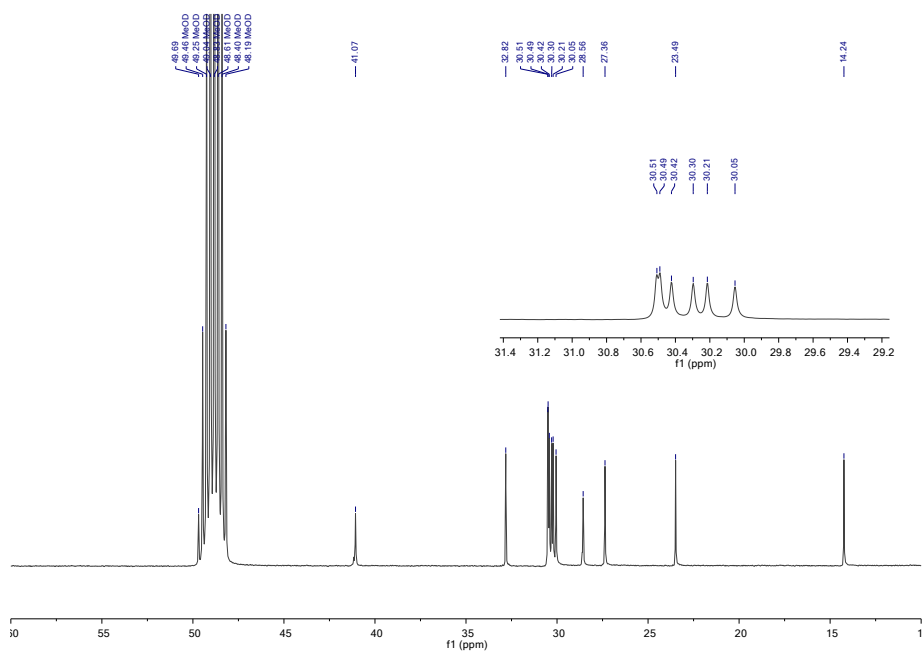

Figure S 6  $^{13}\text{C}$  NMR  $\text{CuC}_{12}$ .

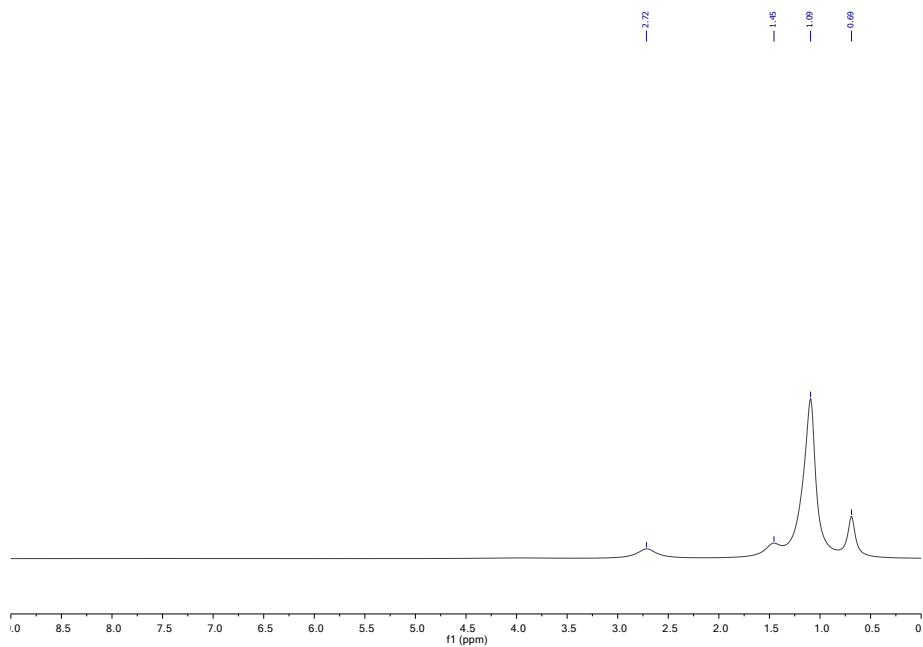

Figure S 7 <sup>1</sup>H NMR MnC<sub>12</sub>.

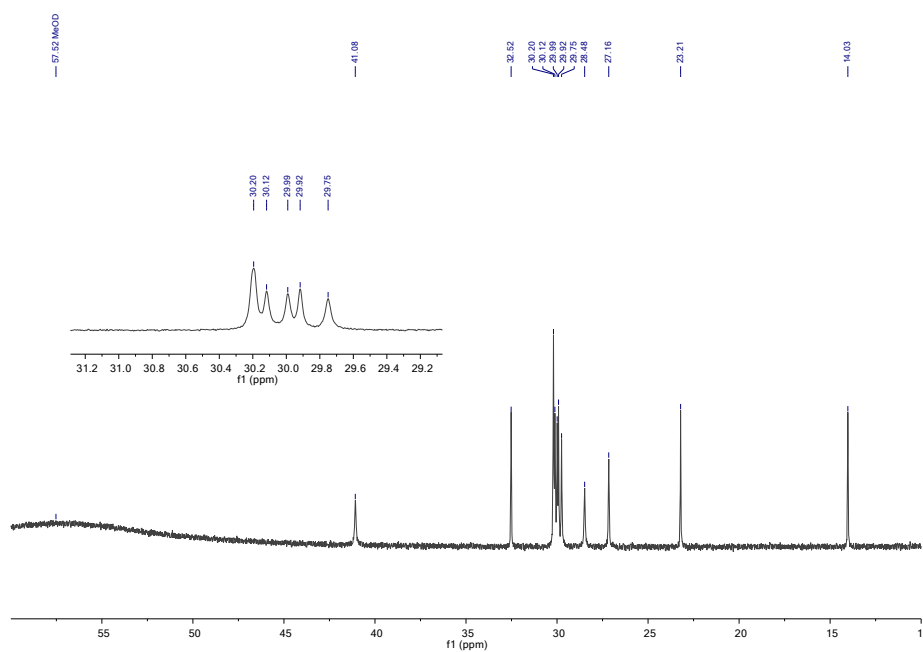

Figure S 8 <sup>13</sup>C NMR MnC<sub>12</sub>.

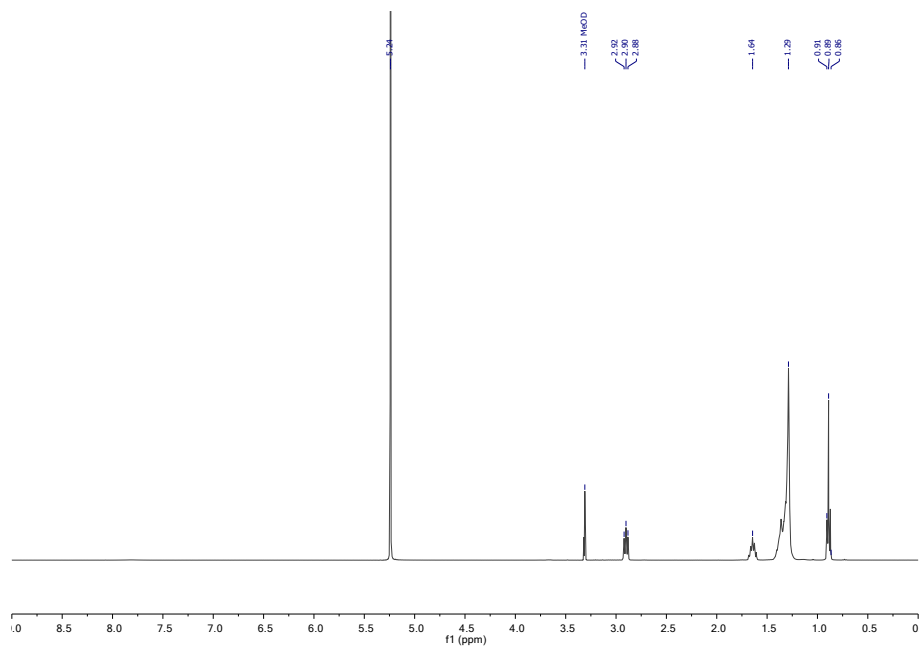

Figure S 9  $^1\text{H}$  NMR  $\text{C}_{12}\text{H}_{27}\text{N} + \text{TFA}$ .

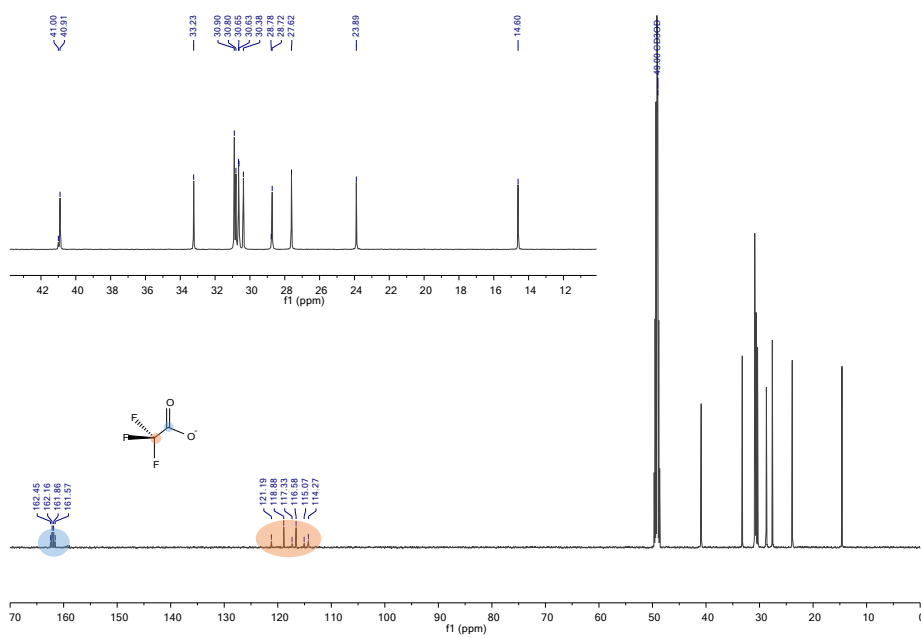

Figure S 10  $^{13}\text{C}$  NMR  $\text{C}_{12}\text{H}_{27}\text{N} + \text{TFA}$ .
